# Supplementary material for: Capturing functional strategies and compositional dynamics in vegetation demographic models
Source: Copernicus journal article supplement (doi:10.5194/bg-18-4473-2021), 2021-07-30
Supplement: Supplementary file 2 [file bg-18-4473-2021-supplement.zip]

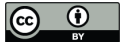

*Supplement of*

**Capturing functional strategies and compositional dynamics in vegetation demographic models**

**Polly C. Buotte et al.**

*Correspondence to:* Polly C. Buotte ([polly.buotte@berkeley.edu](mailto:polly.buotte@berkeley.edu))

- [bg-18-4473-2021-supplement-title-page.pdf](#)
- [BG\\_2021\\_54\\_SI\\_figures\\_revision.pdf](#)
- [SI\\_table1.xlsx](#)

The copyright of individual parts of the supplement might differ from the article licence.
